# Supplementary material for: Screening for Abdominal Aortic Aneurysm during Transthoracic Echocardiography in Patients with Significant Coronary Artery Disease
Source: PubMed Central journal article supplement — Yonsei Med J. 2014 Dec 10;56(1):38–44. doi: 10.3349/ymj.2015.56.1.38 (PMC4276776; doi:10.3349/ymj.2015.56.1.38), 2014-12-10
Supplement: ymj-56-38-s001.pdf [file ymj-56-38-s001.pdf]

**Supplementary Table 1. Prevalence of AAA with CAD Patients in Previous Reports and Our Study**

| References                     | Country         | Age (yrs) | Number of population | CAD severity           | Detection of AAA (%) | Definition of AAA (mm) |
|--------------------------------|-----------------|-----------|----------------------|------------------------|----------------------|------------------------|
| Monney, et al. <sup>18</sup>   | Switzerland     | M>60      | 395                  | CABG                   | 40 (10.1)            | ≥30                    |
| Dupont, et al. <sup>19</sup>   | France          |           | 217 (M 189, F 28)    | CABG                   | 15 (6.9)             | ≥30                    |
| Bergersen, et al. <sup>8</sup> | USA             | M>50      | 192                  | CABG                   | 24 (13)              | ≥30                    |
| Madaric, et al. <sup>9</sup>   | Slovak Republic | M>60      | 109                  | Stenosis ≥50%          | 16 (14)              | ≥30                    |
| Long, et al. <sup>20</sup>     | France          |           | 304 (M 234, F 70)    | ACS with stenosis ≥50% | 20 (6.6)             | ≥30                    |
| Poon, et al. <sup>21</sup>     | Hong Kong       |           | 624 (M 499, F 125)   | CABG                   | 11 (1.8)             | ≥30                    |

AAA, abdominal aortic aneurysm; CAD, coronary artery disease; CABG, coronary artery bypass grafting; ACS, acute coronary syndrome.
